# Supplementary material for: Nucleotide excision repair pathway gene polymorphisms are linked to breast cancer risk in a Chinese population
Source: PubMed Central journal article supplement (PMC5356705; doi:10.18632/oncotarget.12744), 2016-10-19
Supplement: oncotarget-07-84872-s001.pdf [file oncotarget-07-84872-s001.pdf]

## Nucleotide excision repair pathway gene polymorphisms are linked to breast cancer risk in a Chinese population

### SUPPLEMENTARY TABLES

Supplemental Table S1: Characteristics of enrolled articles for the meta-analysis

|    | First author  | Year | Country     | Ethnicity | Source of controls | Genotyping method           | Cases | Controls | Polymorphisms                   |
|----|---------------|------|-------------|-----------|--------------------|-----------------------------|-------|----------|---------------------------------|
| 1  | Forsti        | 2004 | Poland      | Caucasian | PB                 | PCR-RFLP                    | 166   | 203      | rs2228001                       |
| 2  | Mechanic(a)   | 2006 | USA         | African   | PB                 | TaqMan                      | 761   | 679      | rs2228001                       |
| 3  | Mechanic(b)   | 2006 | USA         | Caucasian | PB                 | TaqMan                      | 1267  | 1123     | rs2228001                       |
| 4  | Shen          | 2006 | USA         | Mixed     | HB                 | TaqMan                      | 155   | 150      | rs2228000, rs2228001, rs1800975 |
| 5  | Crew          | 2007 | USA         | Mixed     | PB                 | Taqman                      | 1057  | 1104     | rs1800975                       |
| 6  | Jorgensen     | 2007 | USA         | Caucasian | PB                 | TaqMan                      | 281   | 287      | rs2228000,rs2228001             |
| 7  | Shen          | 2008 | USA         | Mixed     | HB                 | Fluorescence polarization   | 1060  | 1103     | rs2228000,rs2228001             |
| 8  | Smith(a)      | 2008 | USA         | Caucasian | HB                 | MassARRAY                   | 321   | 406      | rs2228000,rs2228001             |
| 9  | Smith(b)      | 2008 | USA         | African   | HB                 | MassARRAY                   | 53    | 74       | rs2228000,rs2228001             |
| 10 | Roberts       | 2011 | USA         | Mixed     | PB                 | Mass spectrometry           | 1044  | 1878     | rs2228000,rs2228001             |
| 11 | Han           | 2012 | South Korea | Asian     | PB                 | Illumina BeadStation 500 GX | 361   | 346      | rs1800975                       |
| 12 | Yang          | 2012 | China       | Asian     | PB                 | PCR-RFLP                    | 618   | 622      | rs2228000,rs2228001             |
| 13 | Perez-Mayoral | 2013 | Puerto Rico | Mixed     | HB                 | TaqMan                      | 355   | 178      | rs2228000                       |
| 14 | Yang          | 2013 | China       | Asian     | PB                 | MassARRAY                   | 461   | 504      | rs11615                         |
| 15 | Ding          | 2015 | China       | Asian     | PB                 | PCR-LDR                     | 596   | 633      | rs1800975                       |
| 16 | Zhu           | 2015 | China       | Asian     | PB                 | PCR-RFLP                    | 101   | 101      | rs11615                         |

**Supplemental Table S2: Minor allele frequencies (MAF) of control in this study and meta-analysis**

| Variables | All enrolled studies |       | Caucasian         |       | Asian             |       | This study |
|-----------|----------------------|-------|-------------------|-------|-------------------|-------|------------|
|           | Number of studies    | MAF   | Number of studies | MAF   | Number of studies | MAF   | MAF        |
| rs2228000 | 8                    | 0.265 | 2                 | 0.253 | 1                 | 0.371 | 0.267      |
| rs2228001 | 10                   | 0.383 | 3                 | 0.403 | 1                 | 0.355 | 0.378      |
| rs1800975 | 4                    | 0.575 | -                 | -     | 2                 | 0.511 | 0.485      |
| Rs11615   | 2                    | 0.333 | -                 | -     | 2                 | 0.333 | 0.480      |
